# Supplementary material
Source: ML conference proceedings conference paper supplement (https://proceedings.mlr.press/v164/lai22a.html)
Supplement: Supplementary file 1 [file lai22a-supp.zip]

# Parallelised Diffeomorphic Sampling-based Motion Planning *Supplementary Material*

Anonymous Author(s)

Affiliation

Address

email

1 Here we provide additional experimental details and results that are complementary to the main text.  
2 When we refer to figures or tables in the main text, we will explicitly annotate them.

## 3 A Experimental details

4 All of the numerical experiments are conducted on a Dell laptop with an Intel i7-10750H at 5.0 GHz  
5 with 12 cores CPU, 32GB RAM and an NVIDIA GeForce GTX 1650 Ti Mobile GPU.

6 The Robot Operating System (ROS) platform is used for the simulation, in which the *MoveIt!*  
7 framework is used as the simulator for manipulator and the Open Motion Planning Library (OMPL)  
8 is used as the basis for our implementation for the sampling-based motion planners.

9 The robotic manipulator used in this experiemnt is the Kinova Jaco arm with a code name of  
10 j2n6s300. The code name refers to the physical robotic arm settings, which is a jaco v2 6DOF  
11 service 3 fingers. The robotic arm has 9 degree of freedom (*dof*) in total, which include 6 *dof*  
12 in the arm and 3 *dof* in the gripper. The joint limits for the 1<sup>st</sup>, 4<sup>th</sup>, 5<sup>th</sup> and 6<sup>th</sup> joint are  $[-\pi, \pi]$   
13 and can wrap back without hard constrains; for the 2<sup>nd</sup> and 3<sup>rd</sup> joints are  $[0.820305, 5.46288]$  and  
14  $[0.331613, 5.95157]$  respectively; and for the fingers of the gripper the joint limits are  $[0, 1.2]$ .

## 15 B Numerical evaluation on the Diffeomorphic Sampling Distribution

16 Table 1 illustrates two metric on the numerical evaluation on our diffeomoprhc sampling distribution  
17 compared to the uniform prior distribution that is commonly used in sampling-based motion planning.

Table 1: Numerical results on (i) the *total number of sampled configurations* (Num. samples) and (ii) *percentage of feasible samples* (Feasible samples) on the original uniform distribution and the parallelised diffeomorphic distribution. *Num. samples* denotes the total drawn samples within the time budget, whereas *Feasible samples* denotes how good those samples are with regards to collisions. Results are obtained by repeating 30 times each for both variants and across all three environments, with a time budget of 20 seconds. Results shown are mean  $\pm$  one standard deviation ( $\mu \pm \sigma$ ).

|          |                   |                | Environment                          |                                      |                                      |
|----------|-------------------|----------------|--------------------------------------|--------------------------------------|--------------------------------------|
|          |                   |                | Divider                              | Cupboard                             | Lab-setup                            |
| Original | Num. samples      | <b>Total</b>   | <b>9543 <math>\pm</math> 907</b>     | <b>22606 <math>\pm</math> 1375</b>   | <b>13153 <math>\pm</math> 554</b>    |
|          | Feasibile samples | <b>Total</b>   | <b>52.19 <math>\pm</math> 0.41 %</b> | <b>12.77 <math>\pm</math> 1.12 %</b> | <b>48.38 <math>\pm</math> 0.86 %</b> |
| PDMP     |                   | <b>Total</b>   | <b>10554 <math>\pm</math> 751</b>    | <b>23536 <math>\pm</math> 1067</b>   | <b>12985 <math>\pm</math> 716</b>    |
|          | Num. samples      | (from Prior)   | 17 $\pm$ 11                          | 5322 $\pm$ 1278                      | 294 $\pm$ 120                        |
|          |                   | (from Morphed) | 10536 $\pm$ 748                      | 18214 $\pm$ 1190                     | 12692 $\pm$ 736                      |
|          |                   | <b>Total</b>   | <b>81.52 <math>\pm</math> 1.22 %</b> | <b>31.96 <math>\pm</math> 2.23 %</b> | <b>72.83 <math>\pm</math> 2.10 %</b> |
|          | Feasibile samples | (from Prior)   | 51.02 $\pm$ 0.85 %                   | 12.98 $\pm$ 1.92 %                   | 49.12 $\pm$ 0.51 %                   |
|          |                   | (from Morphed) | 85.17 $\pm$ 1.74 %                   | 37.51 $\pm$ 2.09 %                   | 73.35 $\pm$ 1.82 %                   |

18 The results for PDMP in table 1 are broken down into samples that are contributed by the uninformed  
19 prior and by the diffeomorphic distribution. The prior is used when the concurrent queue (see Figure 2  
20 in main text) is empty, which might be due to the PDMP is still warming up at the beginning or when  
21 sampled configurations are drawn at a rapid pace. This can be observed in the *Cupboard* environment,  
22 where there are a substantial amount of prior samples. Note that the percentage of morphed samples  
23 is still relatively high at 77% ( $\frac{18214}{23536} \times 100\%$ ). This phenomenon might have occurred due to the low  
24 feasibility (highly clutter) nature of the environment with only 12% of samples being feasible in the  
25 original distribution. This in-turn renders the algorithm needing to draw more samples and spend  
26 less time in the actual tree-building and rewiring procedure of the algorithm.

27 Overall, by comparing *Num. samples* in table 1 it is clear that PDMP can always keep up with the  
28 rate of drawing samples even in the event of rapid samples drawing (in which it will revert back to  
29 prior due to the novel design in the architecture). The morphed samples are then more beneficial to  
30 the planning problem as they are more likely to be feasible in free space.

## 31 C Continuous Differentiable Occupancy Map details

32 We learn a continuous occupancy representation using a neural network, mapping from coordinate  
33 points to the probability of the coordinate being occupied. The Neural network has the architecture:

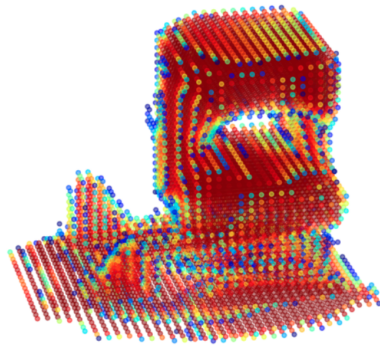

(a) An example reconstructed set-up for our real-world experiments *Lab-setup*

|                |
|----------------|
| Input          |
| Dense(3,150)   |
| Tanh()         |
| Dense(150,150) |
| Tanh()         |
| Dense(150,150) |
| Tanh()         |
| Dense(150,1)   |
| Softmax()      |
| Output         |

(b) Architecture of our continuous occupancy map neural network model

34 where  $Dense(n,m)$  indicates a fully-connected layer with  $n$  inputs and  $m$  outputs. We optimise the  
35 neural network with respect to a binary cross entropy loss, via Adam with a step-size of  $1 \times 10^{-3}$ ,  
36 for 625 epochs.

37 We treat the map as a binary classifier, and evaluate how well the map predict coordinate points in  
38 the task space. The performance of the occupancy representation in the environments used in our  
39 experiments, as measured by accuracy, area under the receiver operating characteristic curve (ROC-  
40 AUC), and precision is given in table 2. We observe that our neural network can accurately capture  
41 occupancy information in the environment.

|           | Divider | Cupboard | Tower |
|-----------|---------|----------|-------|
| Accuracy  | 0.99    | 0.99     | 0.98  |
| ROC-AUC   | 0.99    | 0.93     | 0.98  |
| Precision | 0.97    | 0.93     | 0.99  |

Table 2: The quality of representing environment occupancy via our neural network model

42 Next we pick the “Divider” environment and perform an ablation studying on the number of layers,  
43 and number of units in the hidden layers of our neural network model. To study the effect of the  
44 number of layers, we consider alternative models with 1  $Dense(150,150)$  layer and 3  $Dense(150,150)$   
45 layers, whereas our setup had two of these layers. We also tune the hidden dimension of these layers,  
46 considering alternative models with hidden dimensions of 100 and 200, instead of the default 150.  
47 The results are tabulated in table 3. We observe that adjusting both the number of layers or the hidden  
48 dimension size does not drastically alter performance.

|           | 1-layer | 2-layers | 3-layers | 100 hidden units | 200 hidden units |
|-----------|---------|----------|----------|------------------|------------------|
| Accuracy  | 0.99    | 0.99     | 0.99     | 0.98             | 0.99             |
| ROC-AUC   | 0.99    | 0.99     | 0.99     | 0.98             | 0.99             |
| Precision | 0.97    | 0.97     | 0.98     | 0.96             | 0.98             |

Table 3: Ablation results on the neural network model for occupancy

## 49 D Probabilistic Completeness

50 We shall demonstrate that drawing sample points from the transformed distribution maintains the  
51 probabilistic-completeness of the popular RRT sampling-based method.

52 We shall begin by considering the support of the prior distribution and the transformed distribution.  
53 Let  $P_y$  be the prior probability measure on space  $Y$ , with the diffeomorphism  $F : Y \rightarrow Z$ . Let  
54  $P_z(\mathbf{z}) := P_y(F^{-1}(\mathbf{z}))$ , with  $\mathbf{z} \in Z$

55 **Definition D.1** (Support of probability measure). *Let  $P_y$  be a measure on a topological space  $Y$ , then  
56 the support of  $P_y$  is the set,  $\text{supp}P_y := \{\mathbf{y} \in Y \mid P_y(\mathbf{y}) > 0\}$ ,*

57 Intuitively, the support of a probability distribution is the set of possible values of a random variable  
58 having non-zeros probability density. We shall study how the support of the prior and the transformed  
59 distribution change depending on  $F$ . In particular we consider when the support of the prior and  
60 transformed distributions are equal.

61 **Lemma D.1** ([1] Equation 4). *The support of the prior and transformed probability measure are  
62 equal, i.e.  $\text{supp}P_y = \text{supp}P_z$ , if  $Y$  and  $Z$  are homeomorphic i.e., isomorphic as topological spaces.*

63 As  $F : Y \rightarrow Z$  is a diffeomorphism, that is a differentiable homeomorphism,  $\text{supp}P_y = \text{supp}P_z$ .

64 **Theorem 1** (Probabilistic Completeness). *If a RRT-algorithm, drawing samples from random vari-  
65 able  $\mathbf{y}$ , is probabilistic complete, then the RRT-algorithm drawing samples from  $f(\mathbf{y})$ , where  $f$  is a  
66 diffeomorphism, is also probabilistic complete.*

67 *Proof.* As random variables  $\mathbf{y}$  and  $f(\mathbf{y})$  are linked by diffeomorphism  $f$ , by lemma D.1, they have  
68 the same support. Clearly, as the sampling time  $t \rightarrow +\infty$ , the set of created vertices with the sampling  
69 distribution  $\mathbf{y}$ ,  $V(\mathbf{y})$ , and set of created vertices with the sampling distribution  $f(\mathbf{y})$ ,  $V(f(\mathbf{y}))$ , are  
70 equal. Then by Theorem 23 from [2], the probabilistic completeness follows directly from the prob-  
71 abilistic completeness of RRT with sampling distribution  $\mathbf{y}$ .  $\square$

## 72 E Numerical Evaluation of Motion Planners

73 Table 4 illustrates the numerical results of various motion planners with and without the proposing  
74 diffeomorphic sampler (complementary to Figure 4 in the main text). Overall, PDMP allows each  
75 motion planners to utilise sampled configurations that are more likely to be feasible (see table 1),  
76 which in turn allow PDMP planners to achieve shorter *time-to-solution* when compared to their  
77 original counterpart in table 4. Therefore, they are also more likely to successfully obtain a solution  
78 trajectory within the allocated time budget.

Table 4: Numerical results on various sampling-based motion planners on each environment. The *time-to-solution* refers to the time it took to obtain a solution trajectory (in seconds); and the *success pct.* refers to the percentage of runs that had successfully found a solution. The *Original* refers to the unmodified planner, whereas *PDMP* refers to the same planner with a replaced diffeomorphic sampler. Results are over 30 runs and with a time budget of 20 seconds. Results shown are mean  $\pm$  one standard deviation ( $\mu \pm \sigma$ ).

|              |                  |          | Environment      |                  |                  |
|--------------|------------------|----------|------------------|------------------|------------------|
|              |                  |          | Divider          | Cupboard         | Lab-setup        |
| RRT*         | Time-to-solution | Original | $13.83 \pm 7.72$ | $18.79 \pm 4.53$ | $12.56 \pm 7.78$ |
|              |                  | PDMP     | $5.99 \pm 3.98$  | $17.01 \pm 6.14$ | $9.26 \pm 8.37$  |
|              | Success pct.     | Original | 43.33 %          | 6.67 %           | 53.33 %          |
|              |                  | PDMP     | 96.67 %          | 20.00 %          | 70.00 %          |
| RRT-Connect* | Time-to-solution | Original | $2.72 \pm 0.91$  | $5.51 \pm 7.38$  | $1.60 \pm 0.63$  |
|              |                  | PDMP     | $1.60 \pm 1.26$  | $3.64 \pm 5.76$  | $1.29 \pm 0.44$  |
|              | Success pct.     | Original | 100 %            | 83.33 %          | 100 %            |
|              |                  | PDMP     | 100 %            | 93.33 %          | 100 %            |
| Lazy-PRM*    | Time-to-solution | Original | $14.98 \pm 7.96$ | N/A              | $16.57 \pm 6.93$ |
|              |                  | PDMP     | $13.37 \pm 7.44$ | N/A              | $14.71 \pm 7.07$ |
|              | Success pct.     | Original | 33.33 %          | 0 %              | 20.00 %          |
|              |                  | PDMP     | 43.33 %          | 0 %              | 46.67 %          |

## 79 F PDMP with Various Prior Distribution

80 We extend the plots of the angles distribution across different prior distribution and environments  
81 in Fig. 2 (complementary to Figure 6 in the main text). The plots illustrate the empirical probability  
82 density of the joint angle distribution for the *Divider* (Fig. 3) and the *Cupboard* (Fig. 2b) environment.  
83 We used three different prior distribution: (i) a *Uniform* distribution, (ii) a *Multivariate Normal* distri-  
84 bution and (iii) a *Gaussian Mixture Model* to test the versatility of the diffeomorphic transformation.  
85 The parameters of (ii) and (iii) are randomly chosen and fixed across the two environments.

86 The blue *Prior* line plots refers the probability density of the prior distribution; the orange *Occupancy*  
87 *Potential* refers to the morphed samples with only occupancy potentials (i.e. the main results presen-  
88 ted by this paper); and the green *Bias Center+Occupancy Potentials* illustrates morphed samples  
89 that includes both a potentials to morph towards the center of joints (to inject user bias), and the  
90 occupancy potentials to avoid collisions.

91 All of the green plots should be more concentrated to the center of the joint angles when compared to  
92 the other two. Sometimes it exhibits a higher feasibility even when compared to the orange *occupancy*  
93 *potential* plots, likely due to the fact that biasing towards center had avoided violating the joint limits  
94 (e.g. the 2<sup>nd</sup> and 3<sup>rd</sup> joints which does not wrap around). The orange *occupancy potential* plots tends  
95 to exhibit the highest feasibility across environments. Interestingly, the morphed samples formed a  
96 Multimodal distribution even when the prior is uniform, of which the multimodality likely resembles  
97 the likelihood of free space in the C-Space. The multimodality in Fig. 2b seems to be highly varying  
98 when compared to Fig. 3, which agrees with the low feasibility results of the *Cupboard* environment  
99 in table 1 as the environment is extremely cluttered. Lastly, it is clear that the morphed distribution  
100 is highly resemblance of the prior distribution, which implies that the diffeomorphic transformation  
101 is flexible to be applied to any arbitrary prior distribution to inject user bias or avoid collision from  
102 the occupancy map.

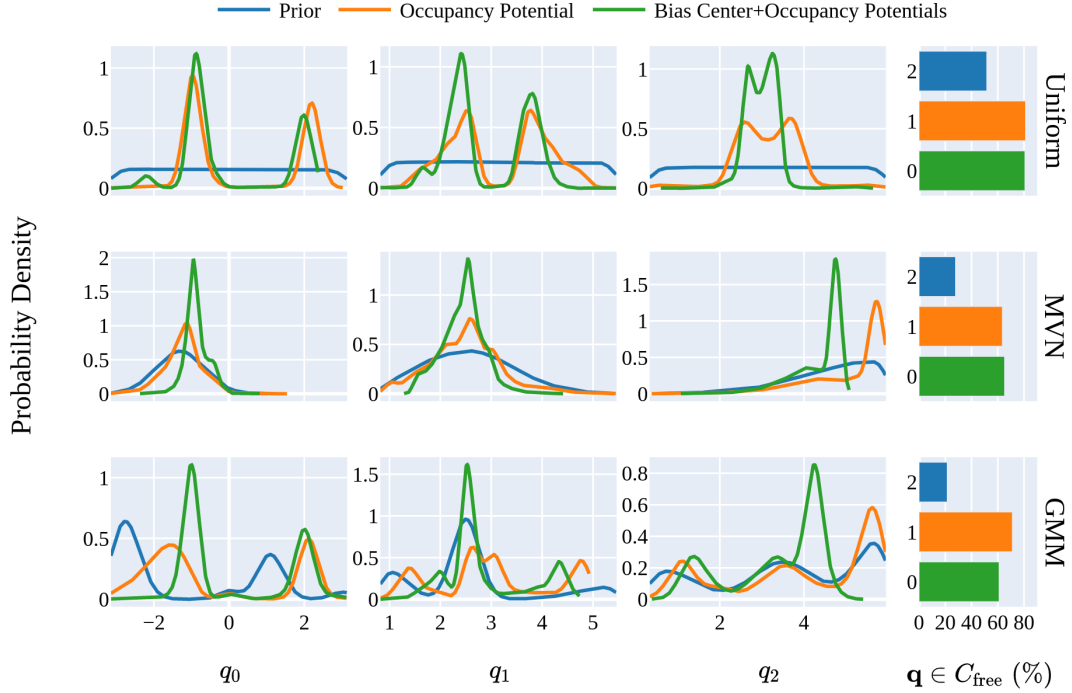

(a) Divider Environment

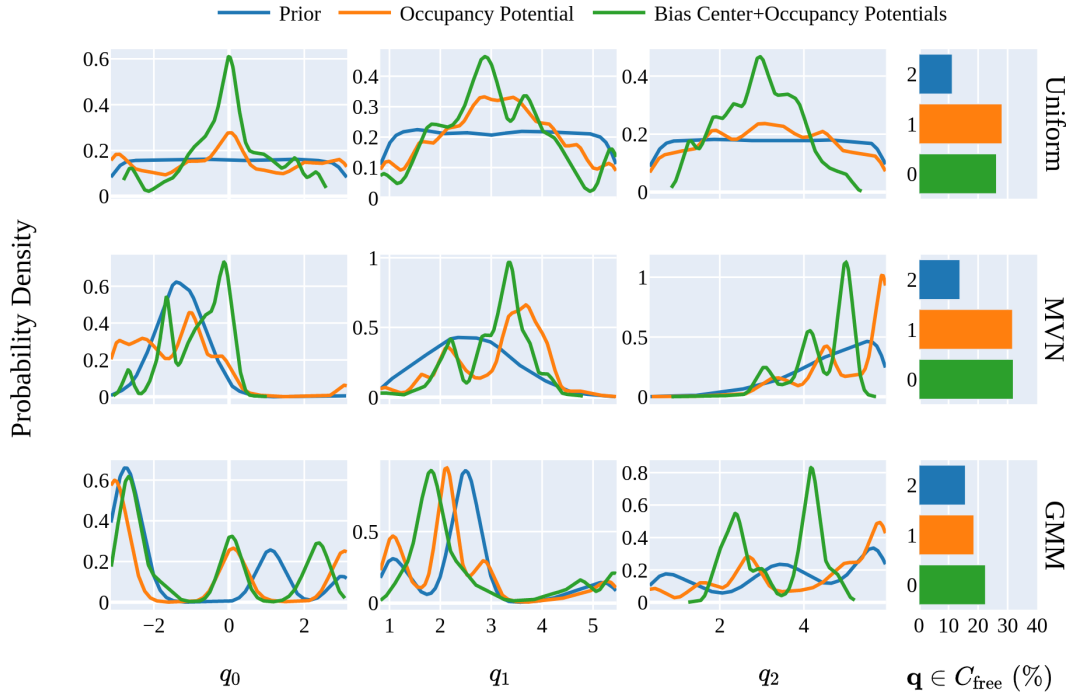

(b) Cupboard Environment

Figure 2: Distribution of angles for the first three joint angles, for the uninformed **prior**, an informed distribution based on **occupancy**, and an informed distribution based on both **user bias** and **occupancy** (biasing towards center of joints, which is the middle of each x-axis). For each sub-figure, the rows from *top to bottom* refers to morphing different prior distributions, which includes a **Uniform**, a **Multivariate Normal (MVN)** and a **Gaussian Mixture Model (GMM)** prior. Parameters for MVN and GMM are randomly picked to be within the range of the joint limits. Each x-axis refers to joint angles (in radian) and y-axis refers to the empirical probability density function obtained with KDE. The right plots on both (a) and (b) refers to the percentage of samples that are feasible.

## 103 G Larger plot of the planner performance

104 Fig. 4 is a larger plot complementary to Figure 4 in the main text

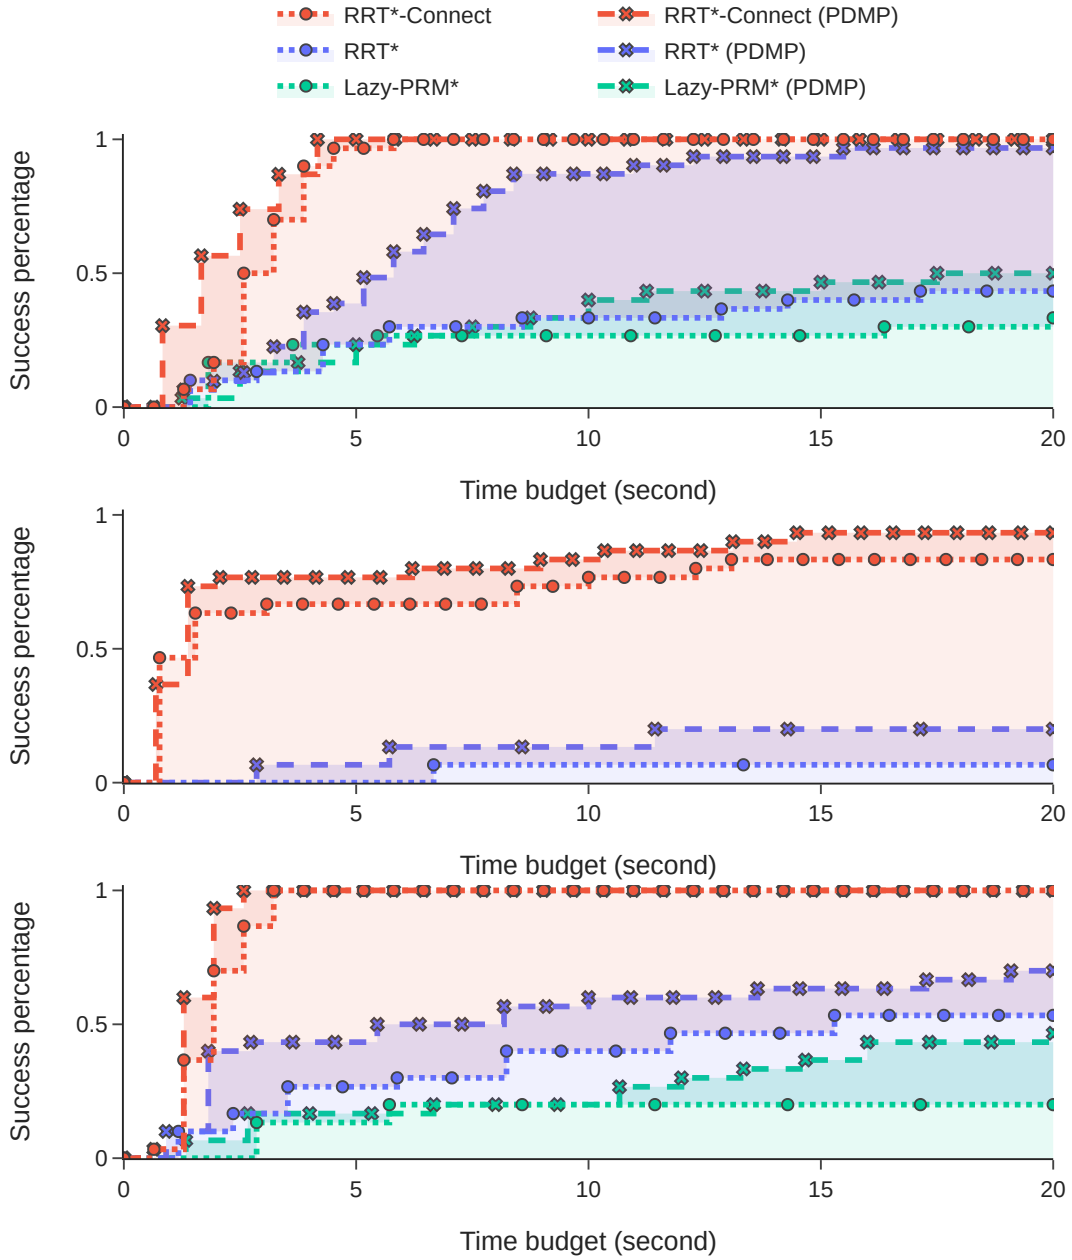

Figure 3: Planner performance

Figure 4: From top to bottom are (i) Divider, (ii) Cupboard and (iii) Lab-setup. The success rate of the planning algorithm variants, over 30 runs. We observe that PDMP enables all flavours of sampling-based motion planning algorithms to have improved success rates, particularly at lower planning times

## 105 H Real-world experiment

106 Fig. 5 visualises the sequence of motion of the planned solution trajectory by PDMP, in the *Divider*  
 107 and *Lab-setup* environment. Videos are also included in the supplementary material.



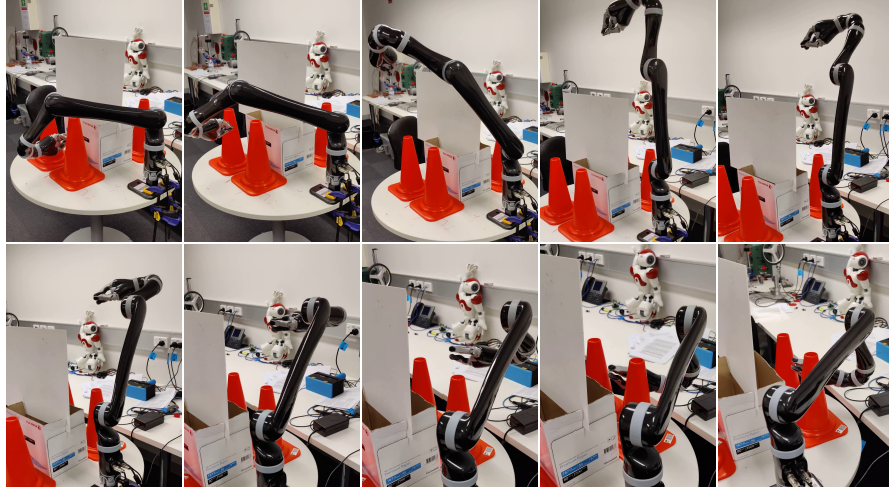

(a) Divider

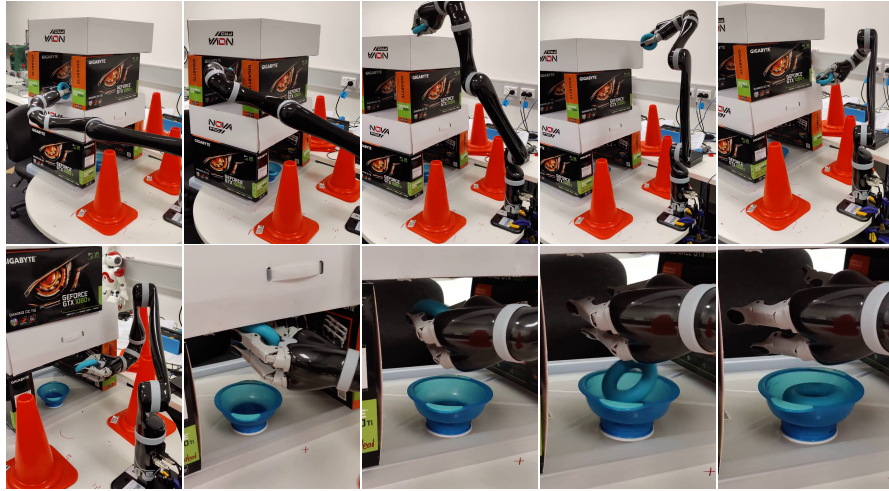

(b) Lab-setup

Figure 5: Sequence of photos that illustrate the lab experiments with the Jaco arm.

## References

- [1] R. Cornish, A. L. Caterini, G. Deligiannidis, and A. Doucet. Relaxing bijectivity constraints with continuously indexed normalising flows. In *ICML*, 2020.
- [2] S. Karaman and E. Frazzoli. Sampling-based algorithms for optimal motion planning. *The International Journal of Robotics Research*, 30(7):846–894, 2011.
